# Supplementary material for: Potential Translational Thioflavin T Methodology as a Complement of Cell-Based Assays and after Drug Exposition
Source: MDPI journal article supplement (doi:10.3390/ijtm2020011), 2022-03-22
Supplement: s1 [file s1]

Archive with 1 entries (1 files):
- ijtm-1401501-supplementary.pdf
