# Supplementary material for: Potential Translational Thioflavin T Methodology as a Complement of Cell-Based Assays and after Drug Exposition
Source: MDPI journal article supplement (doi:10.3390/ijtm2020011), 2022-03-22
Supplement: s1 [file s1 › ijtm-1401501-supplementary.pdf]

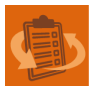

# Supplementary Materials: Potential Translational Thioflavin T Methodology as a Complement of Cell-Based Assays and after Drug Exposition

Ana Salomé Correia <sup>1,2</sup>, Diana Duarte <sup>1,3</sup>, Vera Miranda-Gonçalves <sup>2,4,5</sup> and Nuno Vale <sup>1,6,7\*</sup>

<sup>1</sup> OncoPharma Research Group, Center for Health Technology and Services Research (CINTESIS), Rua Dr. Plácido da Costa, s/n, 4200-450 Porto, Portugal; anncorr07@gmail.com (A.S.C.); dianaduarte29@gmail.com (D.D.)

<sup>2</sup> Department of Pathology and Molecular Immunology, Institute of Biomedical Sciences Abel Salazar, University of Porto (ICBAS-UP), Rua Jorge Viterbo Ferreira 228, 4050-513 Porto, Portugal; vera.miranda.goncalves@ipoporto.min-saude.pt

<sup>3</sup> Faculty of Pharmacy, University of Porto, Rua Jorge Viterbo Ferreira 228, 4050-513 Porto, Portugal

<sup>4</sup> Cancer Biology and Epigenetics Group, IPO Porto Research Center (GEBC CI-IPOP), Portuguese Oncology Institute of Porto (IPO Porto), R. Dr. António Bernardino de Almeida, 4200-072 Porto, Portugal

<sup>5</sup> Porto Comprehensive Cancer Center (P.CCC), R. Dr. António Bernardino de Almeida, 4200-072 Porto, Portugal

<sup>6</sup> Department of Community Medicine, Information and Health Decision Sciences (MEDCIDS), Faculty of Medicine, University of Porto, Rua Dr. Plácido da Costa, s/n, 4200-450 Porto, Portugal

<sup>7</sup> Associate Laboratory RISE – Health Research Network, Faculty of Medicine, University of Porto, Al. Prof. Hernâni Monteiro, 4200 - 319 Porto, Portugal

\* Correspondence: nunovale@med.up.pt; Tel.: +351-220426537

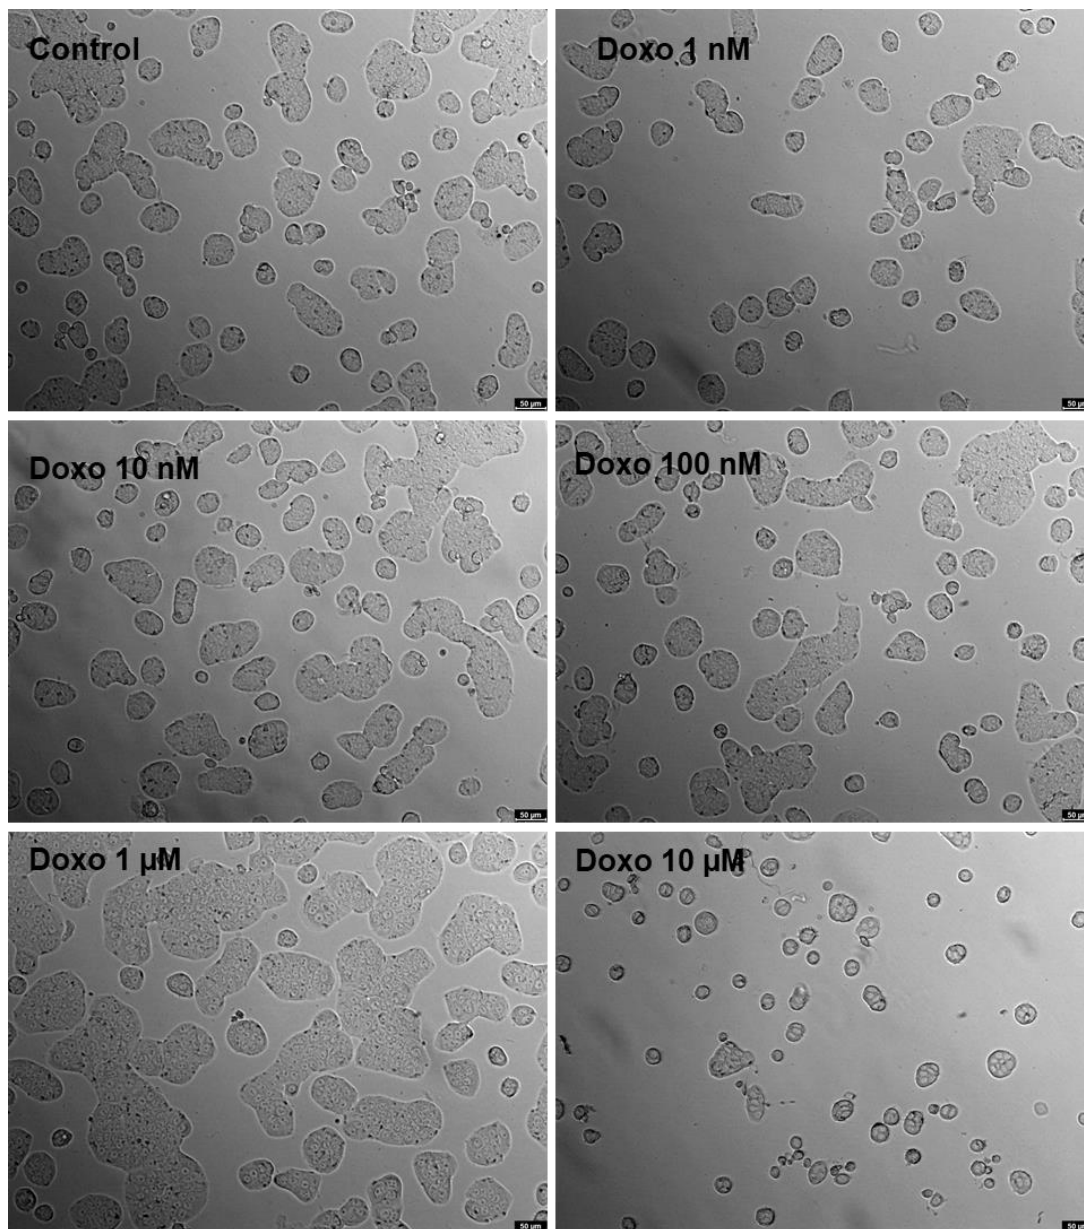

**Figure S1.** Effects of 24 h treatment with DOXO on the morphology of HT-29 cells. Representative images obtained in three independent experiments (n=3). Scale bar: 50  $\mu$ M.

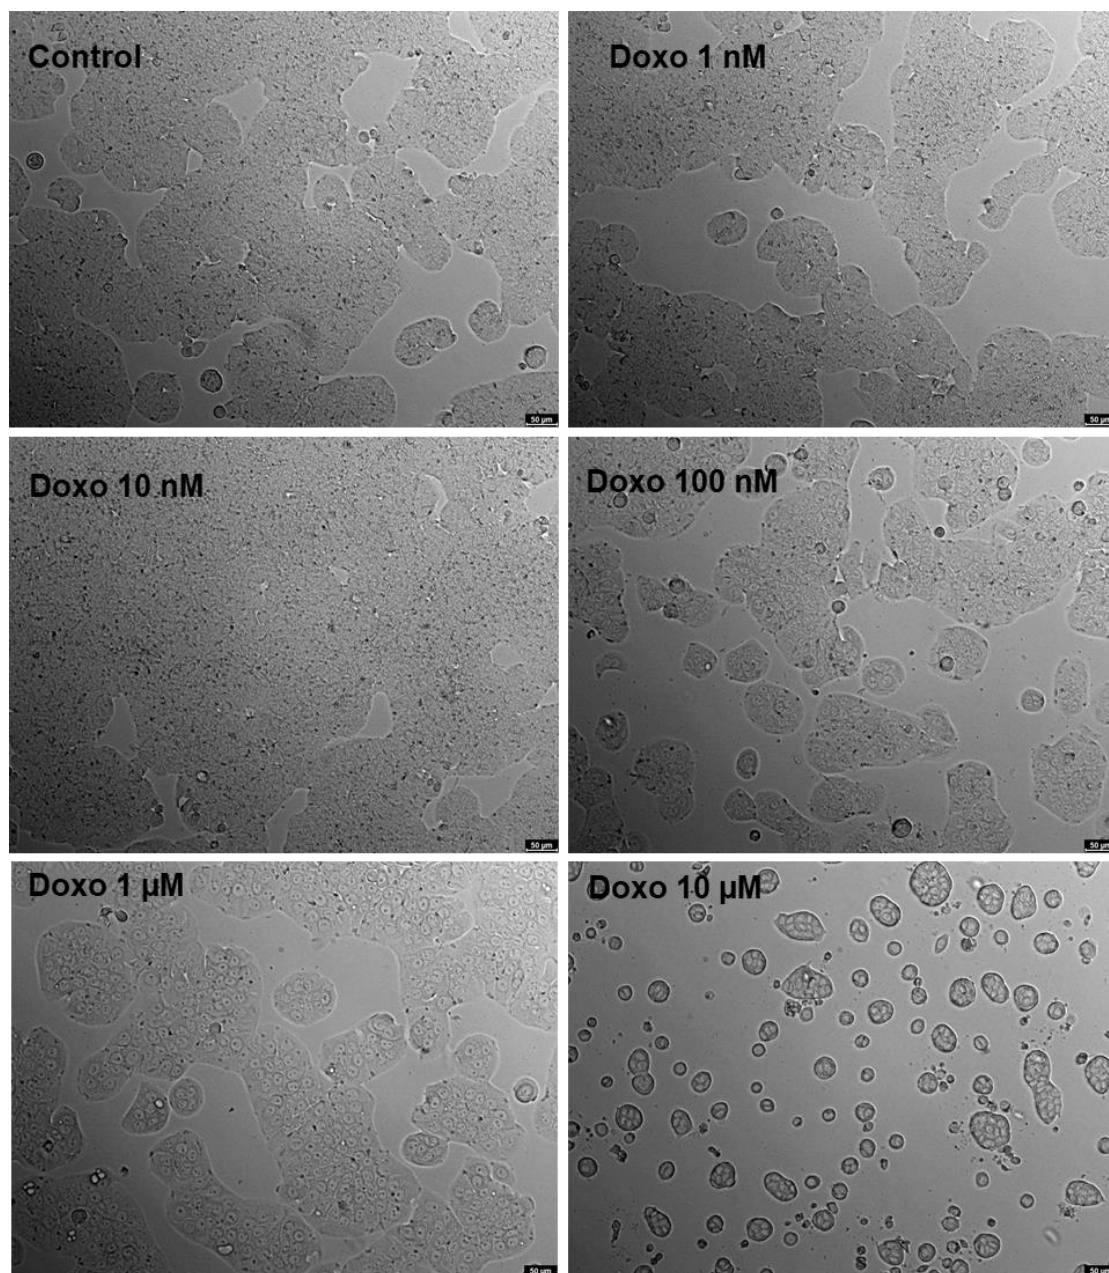

**Figure S2.** Effects of 48 h treatment with DOXO on the morphology of HT-29 cells. Representative images obtained in three independent experiments (n=3). Scale bar: 50  $\mu\text{m}$ .

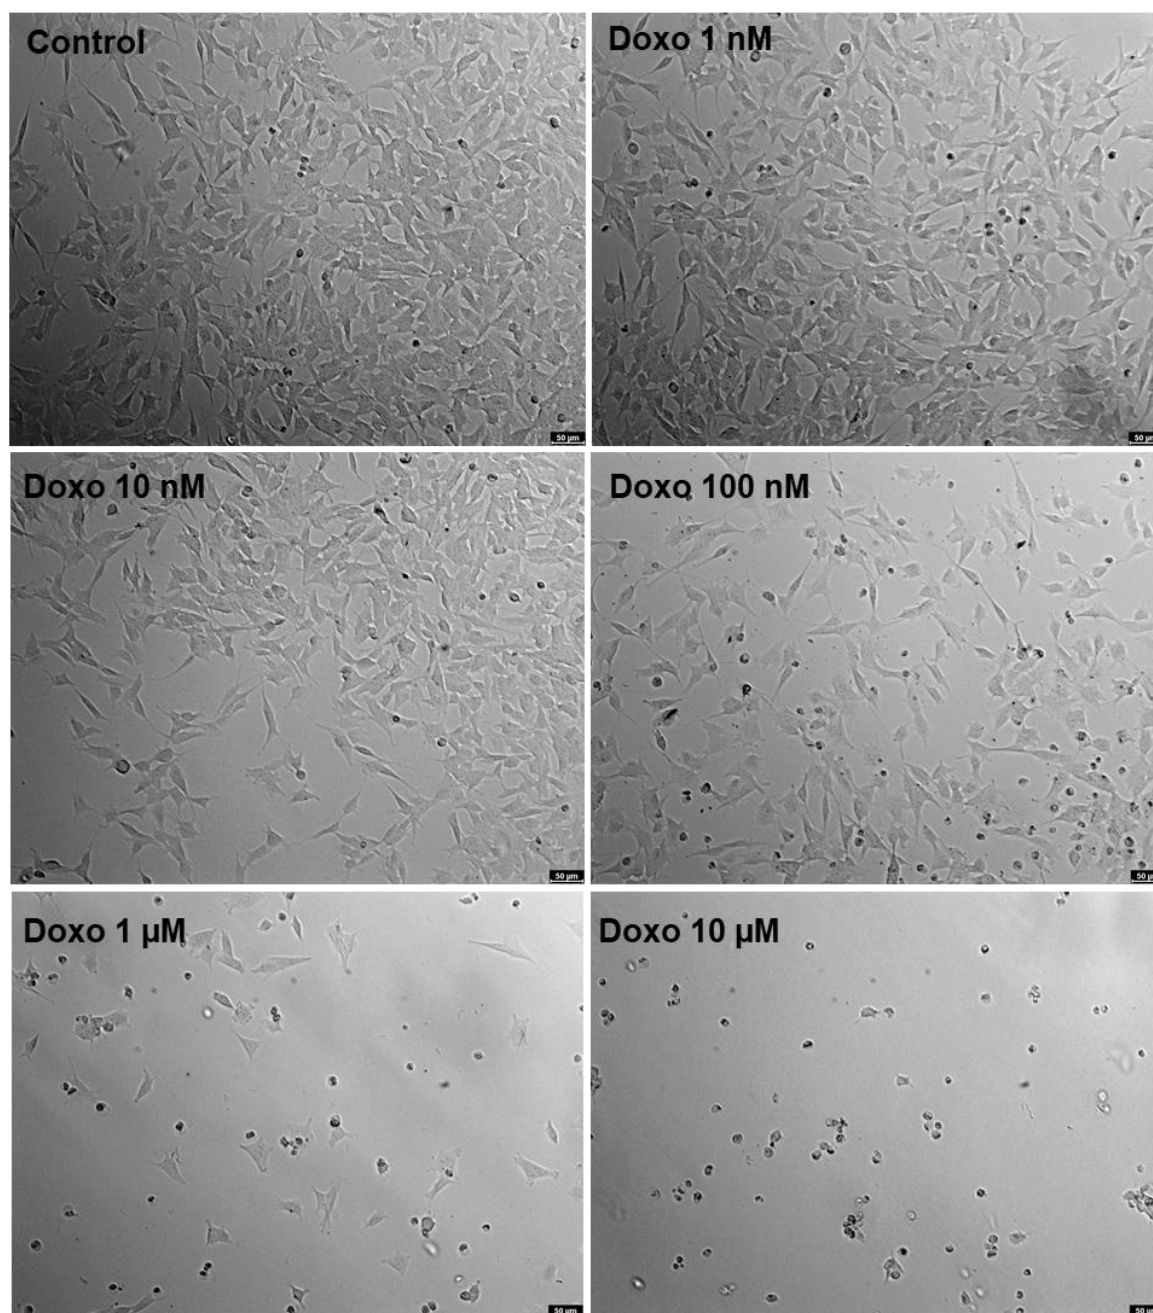

**Figure S3.** Effects of 24 h treatment with DOXO on the morphology of SH-SY5Y cells. Representative images were obtained in three independent experiments (n=3). Scale bar: 50  $\mu$ m.

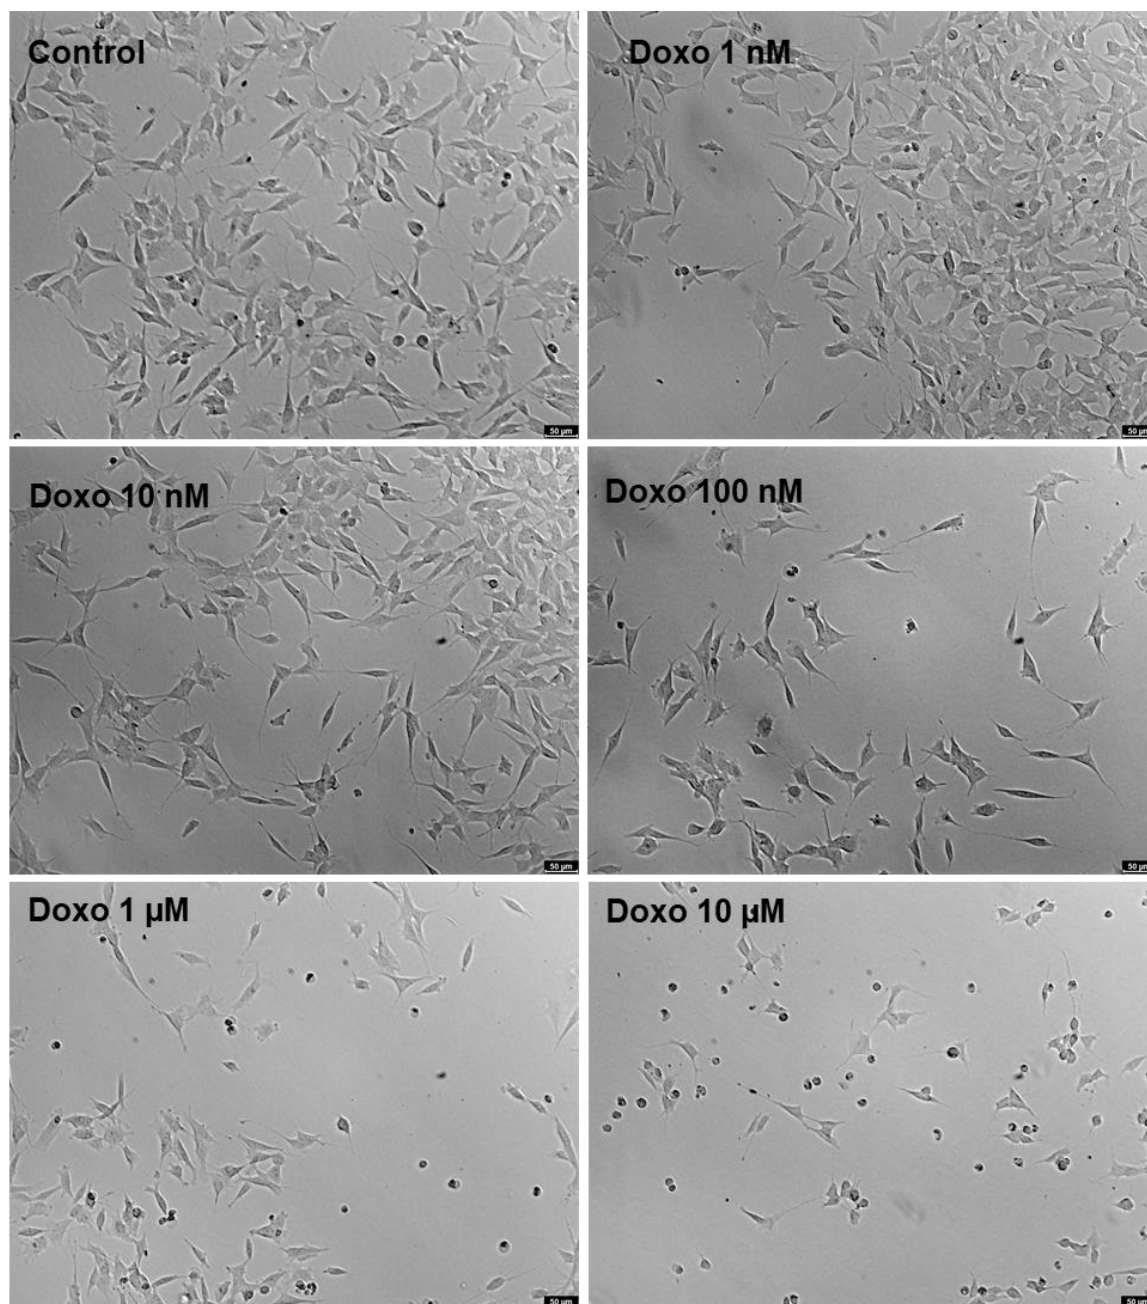

**Figure S4.** Effects of 48 h treatment with DOXO on the morphology of SH-SY5Y cells. Representative images obtained in three independent experiments (n=3). Scale bar: 50  $\mu$ m.
